# Supplementary material for: Enhancing the Thermo-Stability and Anti-Bacterium Activity of Lysozyme by Immobilization on Chitosan Nanoparticles
Source: MDPI journal article supplement (doi:10.3390/ijms21051635), 2020-02-27
Supplement: s1 [file s1]

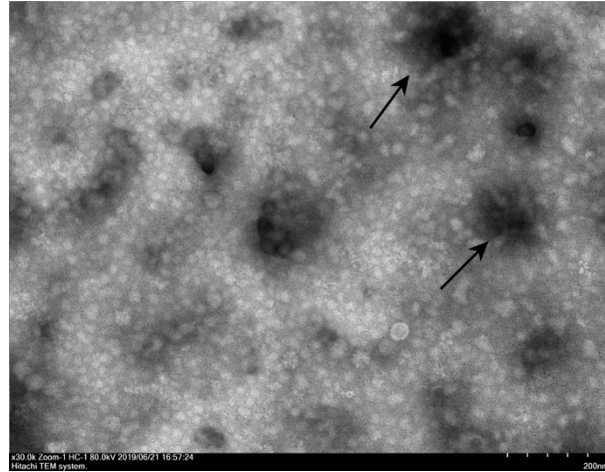

**Figure S1.** TEM image of Lys-CS-NPs. Arrows indicate nanoparticles

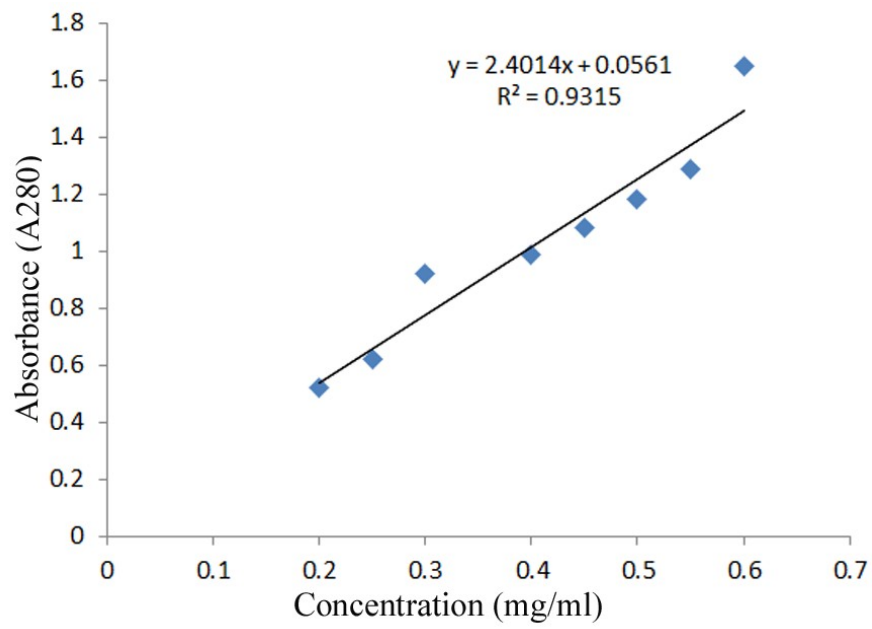

**Figure S2.** A calibration curve of the concentration of lysozyme.
